# Supplementary material for: The Genomic Landscape in Philadelphia-Negative Myeloproliferative Neoplasm Patients with Second Cancers
Source: MDPI journal article supplement (doi:10.3390/cancers14143435), 2022-07-14
Supplement: s1 [file s1]

## **Supplementary Materials**

### **The Genomic Landscape in Philadelphia-Negative Myeloproliferative Neoplasm Patients with Second Cancers**

Hsu *et al.*

A

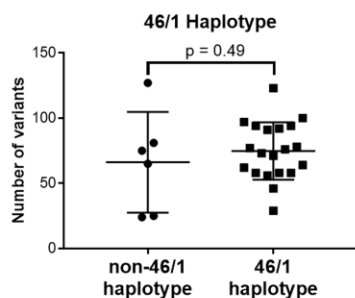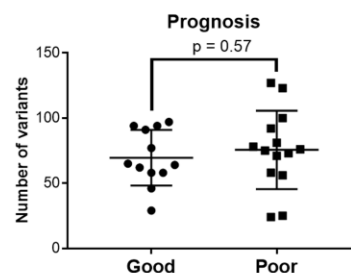

2

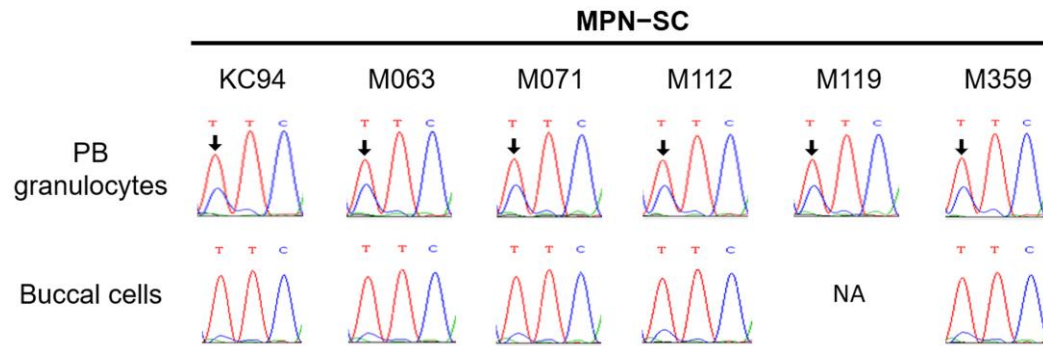

**Supplementary Figure S2. Assessing the nature of the *KRT6A* c.745T>C mutation in MPN patients.** DNA from PB granulocytes and buccal mucosal cells (germline DNA) was extracted and subjected to Sanger sequencing respectively. The mutation was detected in granulocytes but not in buccal cells. The result confirms this mutation being somatic in nature. Arrows indicate the positions of the mutation.

**Supplementary Table 1.** Clinical profiles of enrolled MPN patients with second cancer

| ID              | Age <sup>1</sup> | Sex | Dx     | Driver <sup>2</sup> | SC Type <sup>3</sup> | Origin   | Disease sequence <sup>4</sup> |
|-----------------|------------------|-----|--------|---------------------|----------------------|----------|-------------------------------|
| 1               | 84.1             | F   | PMF    | V617F               | SqCC (Skin)          | Ectoderm | MPN first                     |
| 2               | 70.1             | M   | ET     | <i>CALR</i>         | BCC (Skin)           | Ectoderm | MPN first                     |
| 3               | 45.5             | M   | ET     | V617F               | BCC (Skin)           | Ectoderm | MPN first                     |
| 4               | 43.1             | F   | PV     | V617F               | DCIS (Breast)        | Ectoderm | MPN first                     |
| 5               | 67.4             | M   | ET     | V617F               | Colon                | Endoderm | MPN first                     |
| 6               | 57.6             | F   | PV     | V617F               | Acral Melanoma       | Ectoderm | MPN first                     |
| 7               | 78.5             | M   | PrePMF | V617F               | DLBCL                | Mesoderm | Concurrent                    |
| 8               | 78.0             | M   | PMF    | TN                  | MUO                  |          | Concurrent                    |
| 9               | 92.9             | M   | PMF    | V617F               | HCC                  | Endoderm | Concurrent                    |
| 10              | 75.9             | M   | PMF    | V617F               | Grade II Glioma      | Ectoderm | Concurrent                    |
| 11              | 80.2             | M   | ET     | V617F               | HCC                  | Endoderm | MPN first                     |
| 12              | 65.5             | M   | PV     | V617F               | Lung                 | Endoderm | Concurrent                    |
| 13              | 71.8             | M   | PV     | V617F               | Rectum               | Endoderm | SC first                      |
| 14              | 54.0             | M   | PV     | V617F               | HCC + Cholangio Ca   | Endoderm | MPN first                     |
| 15              | 67.3             | F   | ET     | TN                  | Lung                 | Endoderm | MPN first                     |
| 16              | 62.9             | F   | ET     | V617F               | Lung                 | Endoderm | MPN first                     |
| 17              | 74.0             | F   | ET     | V617F               | Lung                 | Endoderm | MPN first                     |
| 18              | 80.3             | F   | ET     | V617F               | Clear cell carcinoma | Mesoderm | MPN first                     |
| 19              | 87.6             | F   | ET     | V617F               | HCC                  | Endoderm | MPN first                     |
| 20              | 74.6             | M   | ET     | <i>CALR</i>         | TCC                  | Mesoderm | MPN first                     |
| 21              | 70.6             | M   | ET     | <i>CALR</i>         | RCC                  | Mesoderm | SC first                      |
| 22              | 45.9             | M   | ET     | V617F               | Lung                 | Endoderm | MPN first                     |
| 23              | 88.7             | M   | ET     | V617F               | Ampulla Vater        | Endoderm | Concurrent                    |
| 24              | 89.7             | M   | ET     | V617F               | Pancreas             | Endoderm | Concurrent                    |
| 25 <sup>5</sup> | 80.8             | F   | ET     | <i>CALR</i>         | RCC                  | Mesoderm | MPN first                     |
| 26              | 68.9             | F   | ET     | TN                  | Lung                 | Endoderm | SC first                      |
| 27              | 40.5             | F   | PV     | Exon 12             | Cervix               | Mesoderm | SC first                      |

<sup>1</sup> Age: Age in years<sup>2</sup> Driver: Driver mutation: V617F: *JAK2*V617F; *CALR*: *CALR* Exon 9; TN: Triple negative; Exon 12: *JAK2* Exon 12<sup>3</sup> SC: Second cancer: SqCC: Squamous cell carcinoma; BCC: Basal cell carcinoma; DCIS: Ductal carcinoma in situ; DLBCL: Diffuse large B cell lymphoma; MUO: Metastasis of unknown origin; HCC: Hepatocellular carcinoma; Cholangio Ca: Cholangiocarcinoma; TCC: Transitional cell carcinoma; RCC: Renal cell carcinoma<sup>4</sup> Disease sequence: We considered MPN and SC as concurrent diseases if the diagnoses were made within six months of each other.<sup>5</sup> The DNA sample of this case failed quality control scrutinization and was excluded from WES analysis.

**Supplementary Table 2.** Comparison between tumor origins and either MPN subtypes or driver mutations

|                        | Endoderm | Mesoderm | Ectoderm | <i>p</i> -value |
|------------------------|----------|----------|----------|-----------------|
| <b>MPN subtype</b>     |          |          |          | 0.276           |
| <b>PV</b>              | 3        | 1        | 2        |                 |
| <b>ET</b>              | 10       | 4        | 2        |                 |
| <b>PMF/PrePMF</b>      | 1        | 1        | 2        |                 |
| <b>Driver mutation</b> |          |          |          | 0.054*          |
| <b>JAK2</b>            | 12       | 3        | 5        |                 |
| <b>CALR</b>            |          | 3        | 1        |                 |
| <b>TN</b>              | 2        |          |          |                 |

\* *JAK2* vs. *CALR* mutation:  $p = 0.027$

**Supplementary Table 3.** Baseline characteristics of MPN patients enrolled in the current study

| Variables                         | With second cancer (n=26) | MPN Control (n=26) | <i>p</i> -value |
|-----------------------------------|---------------------------|--------------------|-----------------|
| Age <sup>#</sup> , years          | 69.8 ± 14.8               | 71.7 ± 12.6        | 0.632           |
| Male (%)                          | 16 (61.5%)                | 16 (61.5%)         | 1.0             |
| Diagnosis                         |                           |                    | 1.0             |
| PV                                | 6                         | 6                  |                 |
| ET                                | 15                        | 15                 |                 |
| PrePMF                            | 4                         | 4                  |                 |
| PMF                               | 1                         | 1                  |                 |
| Driver mutation                   |                           |                    | 1.0             |
| <i>JAK2</i> V617F                 | 19                        | 19                 |                 |
| <i>JAK2</i> Exon 12               | 1                         | 1                  |                 |
| <i>CALR</i> Exon 9                | 3                         | 3                  |                 |
| <i>MPL</i>                        | 0                         | 0                  |                 |
| Triple negative                   | 3                         | 3                  |                 |
| <i>JAK2</i> V617F AB <sup>^</sup> | 57.9% ± 33.4%             | 56.1% ± 30.2%      | 0.867           |
| MF transform, No. (%)             | 2 (7.7%)                  | 1 (3.8%)           | 1.0             |
| Hydroxyurea exposure              |                           |                    | 0.579           |
| Yes                               | 12                        | 14                 |                 |
| No                                | 14                        | 12                 |                 |
| Anagrelide exposure               |                           |                    | 1.000           |
| Yes                               | 7                         | 7                  |                 |
| No                                | 19                        | 19                 |                 |
| Ruxolitinib exposure              |                           |                    | 0.638           |
| Yes                               | 2                         | 3                  |                 |
| No                                | 24                        | 23                 |                 |
| HU exposure time*                 | 58.4 ± 65.1               | 60.5 ± 57.3        | 0.930           |
| Follow-up duration*               | 84.6 ± 70.6               | 75.8 ± 64.9        | 0.644           |

<sup>#</sup> Age at diagnosis of MPN; mean ± standard deviation

<sup>^</sup> AB: Allele burden

\* Time in months; mean ± standard deviation; HU: hydroxyurea

**Supplementary Table 4.** Variants in *SYNE2*, *ACAN*, and *PDZD7* genes identified in our MPN patients with second cancers

|              | Coding sequence mutation                                  | Amino acid mutation                                                                | Case number | Cancer type*  |
|--------------|-----------------------------------------------------------|------------------------------------------------------------------------------------|-------------|---------------|
| <b>SYNE2</b> | c.7243A>G                                                 | p.Met2415Val                                                                       | 1           | HCC           |
|              | c.10802A>G                                                | p.Gln3601Arg                                                                       | 1           | RCC           |
|              | c.12001_12002delTGinsCA                                   | p.Trp4001Gln                                                                       | 1           | Melanoma      |
|              | c.14939A>C                                                | p.Asp4980Ala                                                                       | 1           | DLBCL         |
|              | c.15740C>T                                                | p.Thr5247Ile                                                                       | 1           | Lung cancer   |
|              | c.18509C>T                                                | p.Thr6170Met                                                                       | 1           | Lung cancer   |
|              | c.19582C>A                                                | p.Gln6528Lys                                                                       | 1           | TCC           |
| <b>ACAN</b>  | c.151_152insTAAAGATAAG                                    | p.Cys51fs*43                                                                       | 1           | Lung cancer   |
|              | c.1666A>T                                                 | p.Arg556Trp                                                                        | 1           | MUO           |
|              | c.2153C>A                                                 | p.Thr718Lys                                                                        | 1           | Rectal cancer |
|              | c.2842G>C                                                 | p.Ala948Pro                                                                        | 1           | Glioma        |
|              | c.4150_4151insCTGCCCCTGGAGTAG<br>AGGACATCAGCGGGCTTCCTTCTG | p.Ala1384_Ala1385insAlaProGlyValGluAspIle<br>eSerGlyLeuProSerGlyGluValLeuGluThrThr | 1           | Lung cancer   |
|              | c.4229_4230insTGCCTAGGAGTGAAT<br>GCACTAAAGCAGGGTTTTTCAAA  | p.Ser1411fs*1                                                                      | 1           | BCC           |
| <b>PDZD7</b> | c.715T>A                                                  | p.Ser239Thr                                                                        | 1           | HCC           |
|              | c.880T>G                                                  | p.Tyr294Asp                                                                        | 1           | Lung cancer   |
|              | c.1267G>A                                                 | p.Ala423Thr                                                                        | 1           | Melanoma      |
|              | c.1529G>A                                                 | p.Gly510Asp                                                                        | 1           | Rectal cancer |
|              | c.2126A>C                                                 | p.His709Pro                                                                        | 1           | DCIS (Breast) |

\* Cancer type: the subtype of SC in our enrolled MPN patients. HCC: Hepatocellular carcinoma; RCC: Renal cell carcinoma; DLBCL: Diffuse large B cell lymphoma; TCC: Transitional cell carcinoma; MUO: Metastasis of unknown origin; BCC: Basal cell carcinoma; DCIS: Ductal carcinoma in situ.

**Supplementary Table 5.** Information on PCR primers used in this study

| <b>Primer</b>            | <b>Sequence (5'-3')</b>       |
|--------------------------|-------------------------------|
| <b>h_SYNE2_M2415V_F</b>  | GTCTATAATCCAAGTAAACAGAAGAAACT |
| <b>h_SYNE2_M2415V_R</b>  | GACTTTTCACTCTGTACAAGCAAGT     |
| <b>h_SYNE2_Q3601R_F</b>  | CTATTCAGGCATTTTCATTAATTGTTGCA |
| <b>h_SYNE2_Q3601R_R</b>  | TGGATACAAGACTGTGGGCCT         |
| <b>h_SYNE2_W4001Q_F</b>  | GCATATTTGCTGTGAGTGATTAAAACT   |
| <b>h_SYNE2_W4001Q_R</b>  | CACTGCACCACTAGAAAGGCT         |
| <b>h_SYNE2_E4695A_F</b>  | GATAACTATGTGTACTTCTCTGACTTA   |
| <b>h_SYNE2_E4695A_R</b>  | CTGTGTACCTGGCTCTTAGCAT        |
| <b>h_SYNE2_D4980A_F</b>  | TTAGGACTGATCAACATAGGAGGA      |
| <b>h_SYNE2_D4980A_R</b>  | CATTCGCCCAAGTCTTACCC          |
| <b>h_SYNE2_T6170M_F</b>  | CGGGTGTCAGGGGATAAAAGA         |
| <b>h_SYNE2_T6170M_R</b>  | GCTGGCTACTTAGAGGAAGTCA        |
| <b>h_ACAN_T692P_F</b>    | AAGGACGGGTCACTGGTAAGA         |
| <b>h_ACAN_T692P_R</b>    | GTAGGAAGACAGGGGTATGCA         |
| <b>h_ACAN_R556W_F</b>    | GTGCATCTACCAGCCCCTG           |
| <b>h_ACAN_R556W_R</b>    | CTTTGTATCGCCCTGTCAGCT         |
| <b>h_CEP164_Q525R_F</b>  | CACACACTGTACTCCCCAGTT         |
| <b>h_CEP164_Q525R_R</b>  | TACACACAGAGCAGCCACCA          |
| <b>h_PDZD7_G510D_F</b>   | CTCCTGAACCCCATTTTCAGACT       |
| <b>h_PDZD7_G510D_R</b>   | CAGTATGCACCCTCATCTGC          |
| <b>h_PDZD7_S239T_F</b>   | GTGGTGGGTGGCAGTGGA            |
| <b>h_PDZD7_S239T_R</b>   | TGCACCAGTCAAGGTCCTTGA         |
| <b>h_PDZD7_Y294D_F</b>   | GAAGTTGAAAGTTTACTCCCATCCT     |
| <b>h_PDZD7_Y294D_R</b>   | CGAGGTCTACCTATATGGCCAA        |
| <b>h_PDZD7_A423T_F</b>   | CTAAGCCCAAGGGTGGTCT           |
| <b>h_PDZD7_A423T_R</b>   | GATGTGAGACAGGTTTTGGACCA       |
| <b>h_KRT6A_239_249_F</b> | GGTGCGGTTCTGAGCA              |
| <b>h_KRT6A_239_249_R</b> | GTGCTCTTCATTTCCACGGACAT       |



## Reference

1. Marchetti, M.; Ghirardi, A.; Masciulli, A.; Carobbio, A.; Palandri, F.; Vianelli, N.; Rossi, E.; Betti, S.; Di Veroli, A.; Iurlo, A.; et al. Second cancers in MPN: Survival analysis from an international study. *Am J Hematol* **2020**, *95*, 295-301, doi:10.1002/ajh.25700.
